# Supplementary material for: Epitaxial silicides: the case of Fe, Ni, and Ti
Source: Royal Society of Chemistry journal article supplement (doi:10.1039/c6ce01375a), 2016-01-01
Supplement: c6ce01375a1.pdf [file c6ce01375a1.pdf]

## **Supplementary information for “Epitaxial Silicides: The Case of Fe, Ni, and Ti”**

Cheng-Lun Hsin<sup>1,\*</sup> and Yu-Shin Tsai<sup>1</sup>

<sup>1</sup>Department of Electrical Engineering, National Central University, Taoyuan, Taiwan,  
32001

\* Correspondence author E-mail: clhsin@ee.ncu.edu.tw

### **Supplementary Information**

#### **List of contents.**

**Figure S1 | XRD spectrum of the  $\beta$ -FeSi<sub>2</sub> nanodots on the (001)Si substrate.**

**Figure S2 | TEM image of  $\beta$ -FeSi<sub>2</sub> nanodots on the (001)Si substrate.**

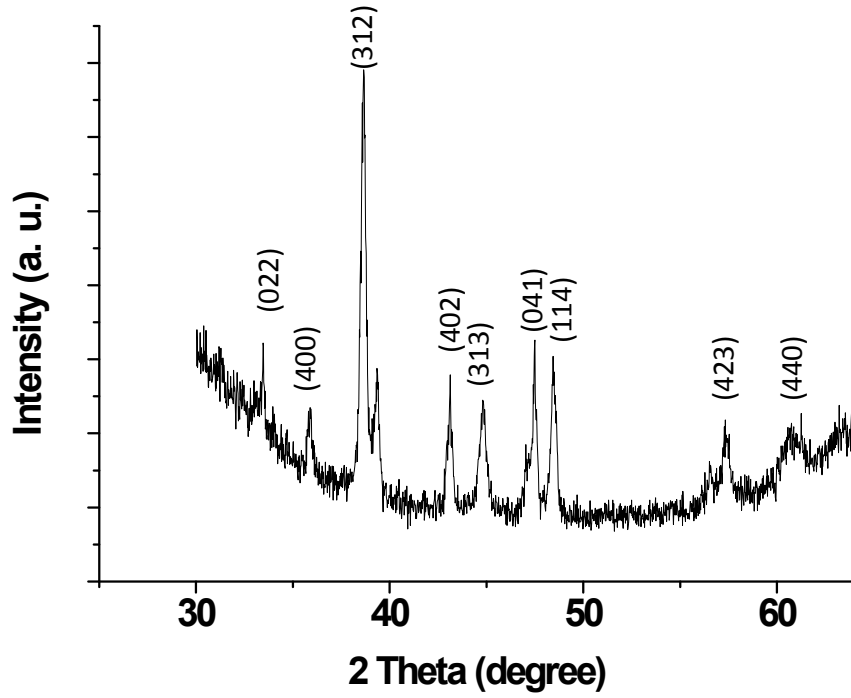

**Figure S1 | XRD spectrum of the  $\beta$ -FeSi<sub>2</sub> nanodots on the (001)Si substrate.** We have examined our samples by XRD to confirm the phase of FeSi<sub>2</sub> on the Si substrate annealed at 850 °C. The spectrum shows multiple distinct XRD peaks. The crystal structure and lattice constant of FeSi<sub>2</sub> is identified as the orthorhombic Cmca space group with lattice constant 0.9863 nm  $\times$  0.7791 nm and 0.7833 nm, respectively. The XRD spectrum of our sample confirmed the poly-crystallinity of FeSi<sub>2</sub> on the Si substrate.

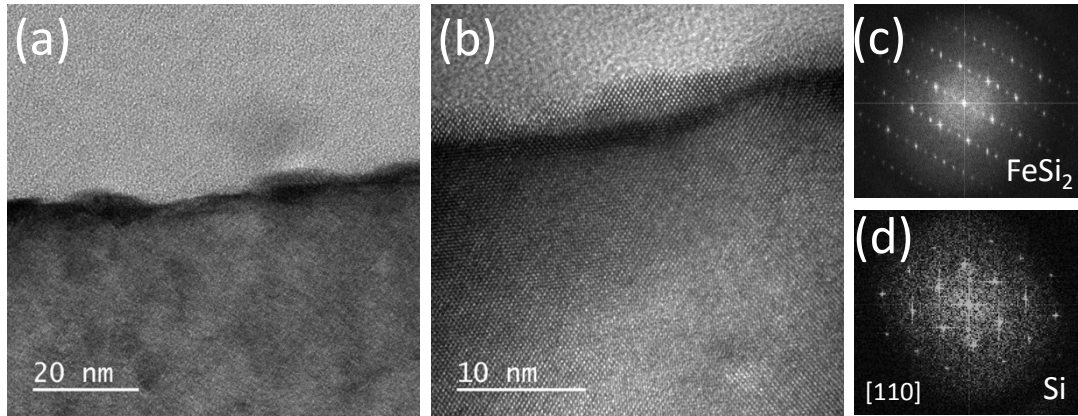

**Figure S2 | TEM image of  $\beta$ -FeSi<sub>2</sub> nanodots on the (001)Si substrate.** We have examined our samples by TEM to confirm the structure of FeSi<sub>2</sub> on the Si substrate annealed at 850 °C. FeSi<sub>2</sub> has become nanodot-like structure, as shown in Fig. S2(a). For the crystallinity of each nanodot, the HRTEM image in (b) proves that each nanodot is single-crystalline. Figure S2(c) and (d) are the diffraction patterns made by FFT from the HRTEM image of FeSi<sub>2</sub> and Si, respectively.
